# Supplementary material for: Evaluation of the role of the Baltic depression during deglaciation of the last Scandinavian Ice Sheet; a landform-driven investigation
Source: Copernicus journal article supplement (doi:10.5194/tc-2023-107), 2023-07-25
Supplement: Supplementary file 1 [file tc-2023-107-supplement.zip]

Archive with 2 entries (2 files):
- Baltic_Szuman_etal.2023_v2_sup.pdf
- FigS1.png
