# Supplementary material for: Evaluation of the role of the Baltic depression during deglaciation of the last Scandinavian Ice Sheet; a landform-driven investigation
Source: Copernicus journal article supplement (doi:10.5194/tc-2023-107), 2023-07-25
Supplement: Supplementary file 1 [file tc-2023-107-supplement.zip › Baltic_Szuman_etal.2023_v2_sup.pdf]

**Figure S1. Landforms mapped in this study in a high resolution version. Study area is indicated with dashed line. Light and dark grey indicate onshore and offshore areas respectively. The DEM is based on EU-DEM and EMODnet (see Table 2).**
