# Supplementary figures and images for: Evaluation of the role of the Baltic depression during deglaciation of the last Scandinavian Ice Sheet; a landform-driven investigation
Source: Copernicus journal article supplement (doi:10.5194/tc-2023-107), 2023-07-25

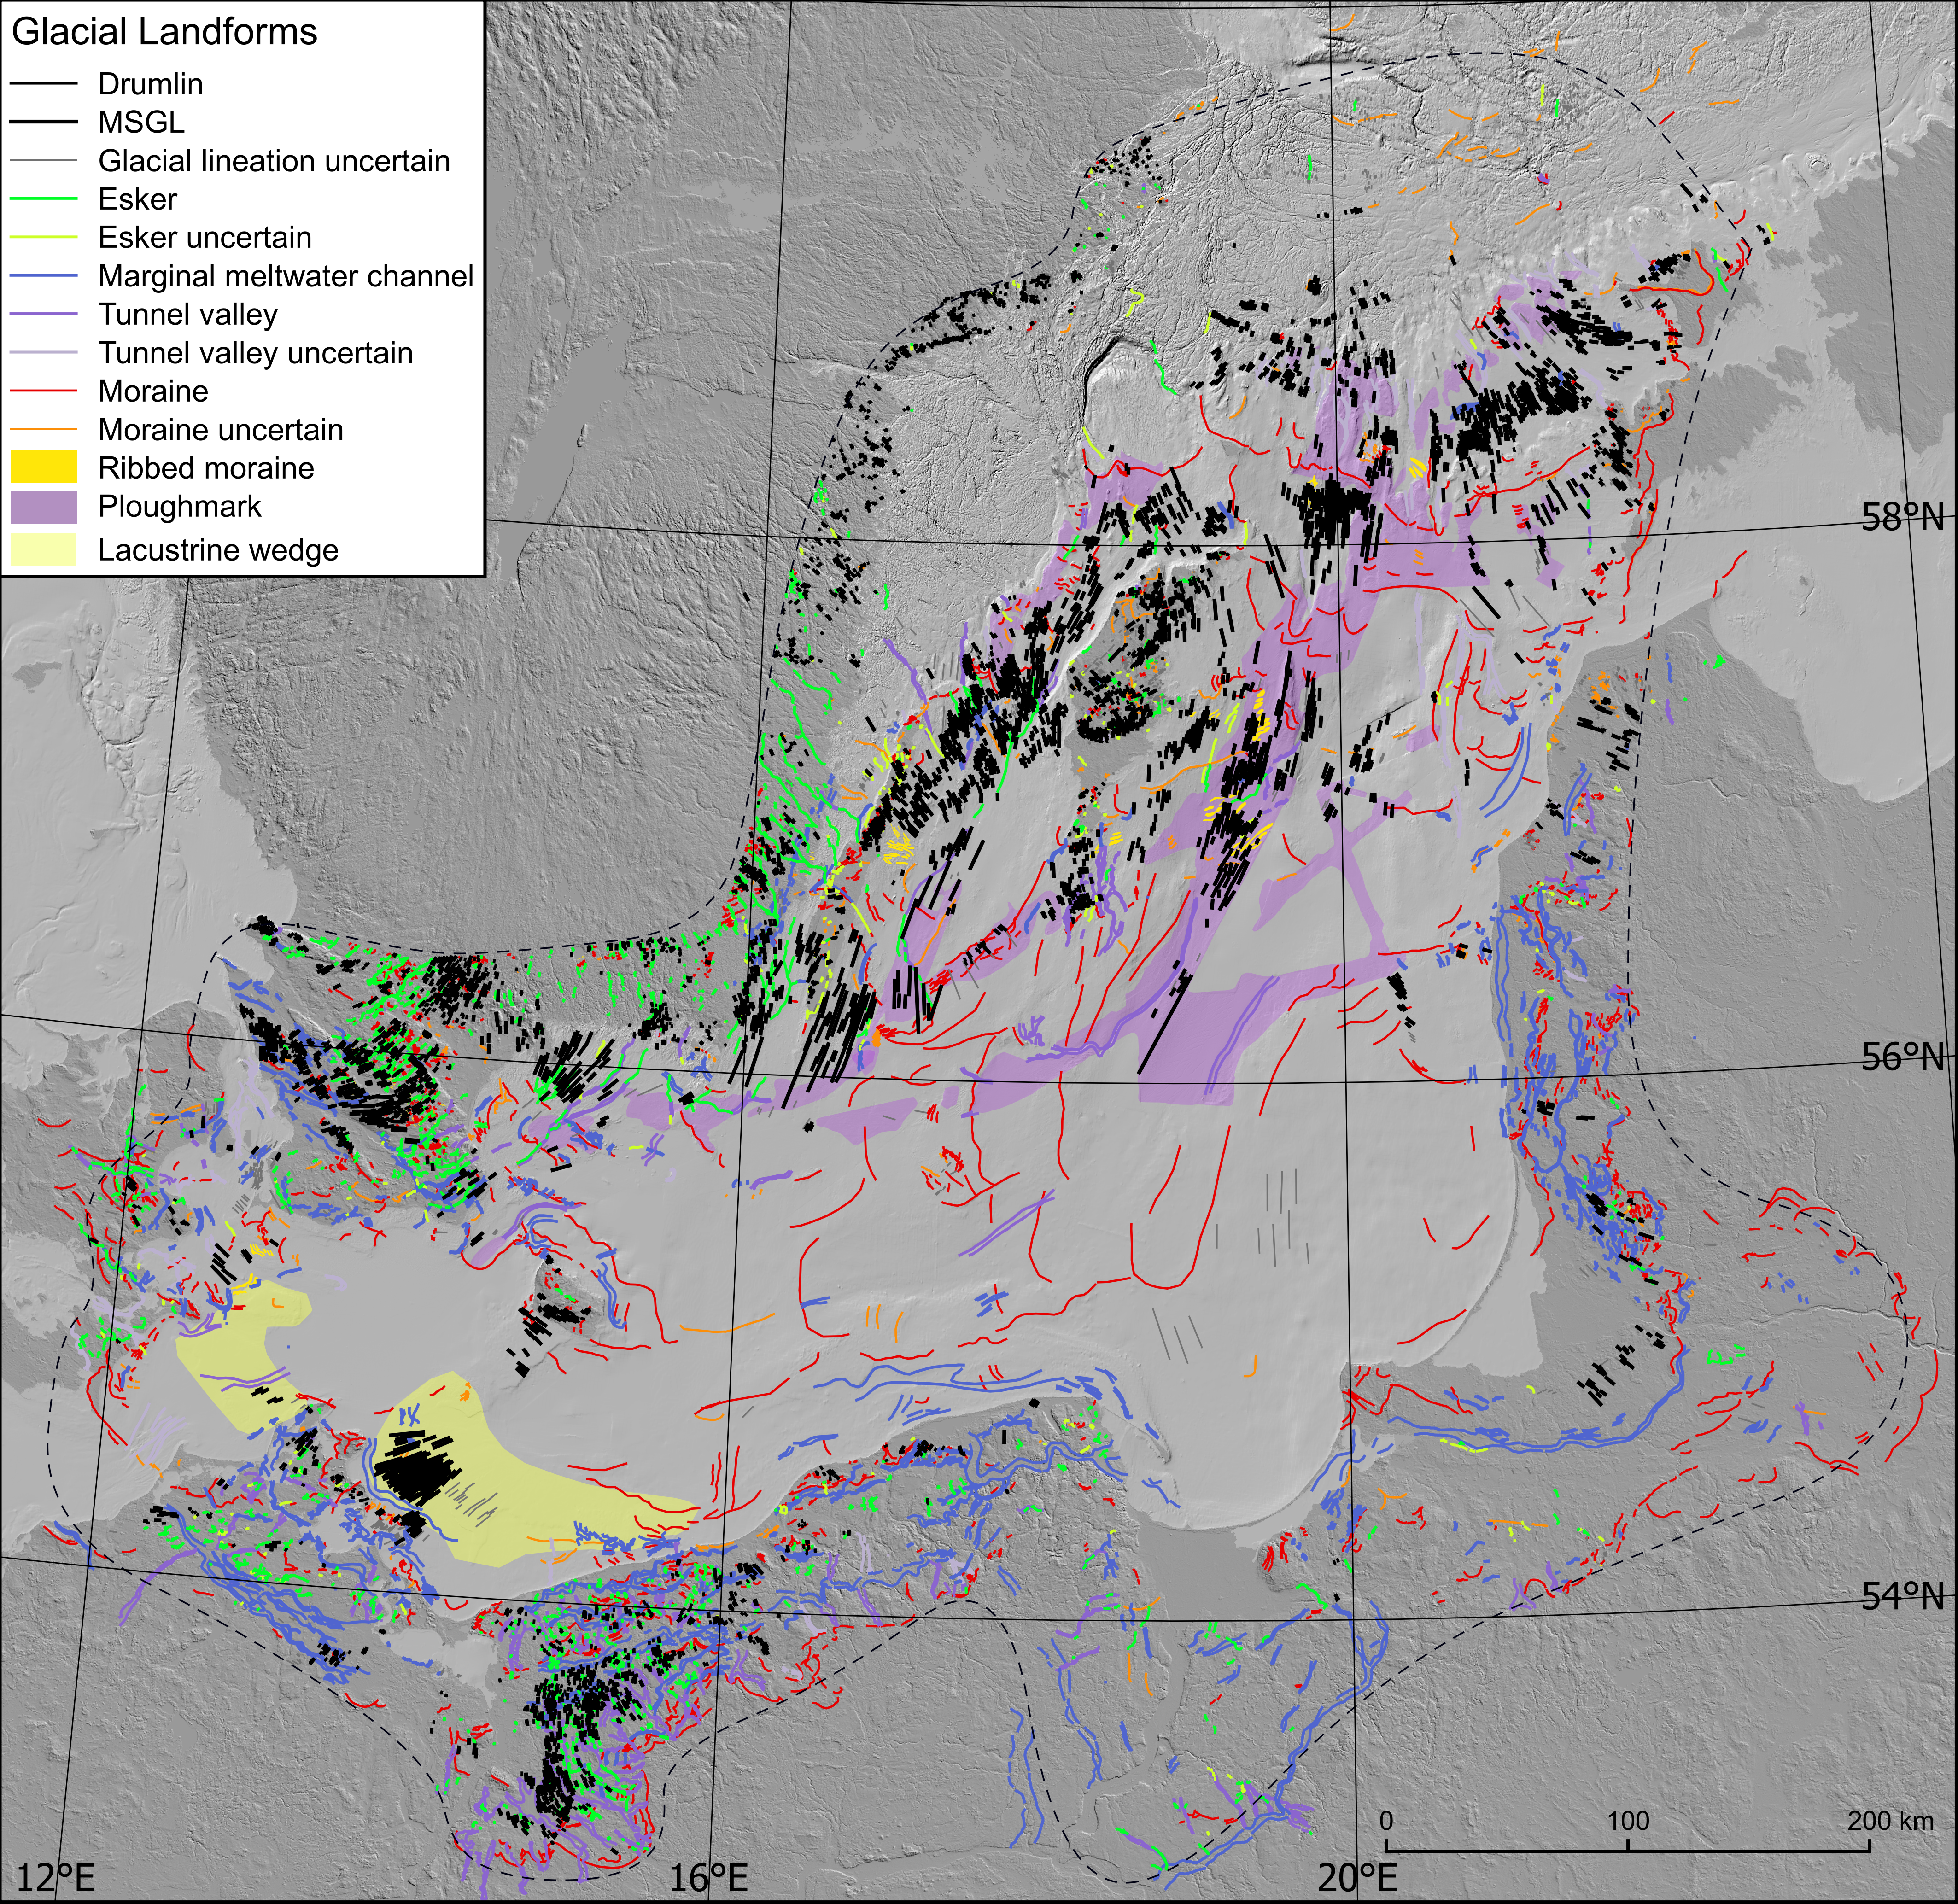

Supplement: Supplementary file 1 [file tc-2023-107-supplement.zip › FigS1.png]
